# Supplementary material for: Genetic consequences of pond production of a pikeperch (Sander lucioperca L.) stock with natural origin: the effects of changed selection pressure and reduced population size
Source: PeerJ. 2020 Mar 17;8:e8745. doi: 10.7717/peerj.8745 (PMC7083162; doi:10.7717/peerj.8745)
Supplement: Supplemental Information 3 [file peerj-08-8745-s003.xls]

## Sheet: Summary statistics for each loc
	Na		Ho		He		uHe		F		Ar		Arp		HW test Broodstock		HW test Offspring		HW test Wild
	Mean	SE	Mean	SE	Mean	SE	Mean	SE	Mean	SE	Mean	SE	Mean	SE	ChiSquare	Prob	ChiSquare	Prob	ChiSquare	Prob
Msl-1	9	2.51661	0.687352	0.133386	0.661377	0.10043	0.669097	0.101469	-0.0272248	0.0470635	8.70607	2.32243	2.19633	2.19039	17.1422	0.702452	32.218	0.00601225	54.5298	0.999131
Msl-3	6.33333	1.45297	0.646838	0.0211678	0.61782	0.0378152	0.625023	0.0379758	-0.0573909	0.0875686	6.1489	1.28581	1.5415	1.07439	6.72051	0.964946	5.575	0.472438	61.48	0.0051227
Msl-5	14.6667	3.4801	0.877306	0.0177232	0.856882	0.0128724	0.86691	0.0127323	-0.0248243	0.034551	14.3084	3.21844	3.19767	2.5913	96.4349	0.328408	55.5395	0.0197838	237.433	0.0939936
Msl-6	7	1	0.82948	0.0406972	0.777164	0.00784772	0.786264	0.00777358	-0.0682019	0.0602566	6.90687	0.907367	0.9507	0.95065	19.2645	0.201997	24.3417	0.059513	41.0447	0.258941
Msl-9	7	1	0.630863	0.110793	0.676094	0.0883969	0.684088	0.0897017	0.0797822	0.0497161	6.81557	0.815567	0.9078	0.9078	11.7265	0.699605	17.2545	0.303879	99.7188	6.78899e-08
Msl-2	7.33333	1.45297	0.729381	0.0176031	0.668564	0.0256209	0.676375	0.0256433	-0.0922058	0.0181896	7.1615	1.34946	1.68587	1.57651	13.3611	0.89545	14.5026	0.151276	24.1229	0.995421
Svi-18	9.33333	1.85592	0.796673	0.0417368	0.767749	0.0287599	0.776728	0.0289024	-0.0379323	0.0412897	9.18857	1.71729	1.57997	1.57862	22.2279	0.770634	45.1107	0.00167496	77.5562	0.492886
Svi-4	8	1	0.677602	0.108154	0.678497	0.0603569	0.686499	0.0613632	0.0145805	0.0748887	7.79253	0.842365	0.9134	0.91285	22.8541	0.351809	27.6781	0.149518	51.7173	0.228097
Svi-6	7.66667	1.66667	0.772036	0.0391325	0.770923	0.0155149	0.779964	0.0159424	-0.000293105	0.0328607	7.44403	1.44403	1.49277	1.49277	13.6234	0.554258	23.8538	0.067618	27.7964	0.999176
Svil-L7	6	0	0.600527	0.0205398	0.622077	0.0227758	0.629372	0.0231524	0.0344439	0.00460123	5.96893	0.0301711	6.66667e-05	6.66667e-05	17.9336	0.266173	17.6096	0.283748	12.5816	0.634577
PflaL3	5	0.57735	0.62836	0.0760776	0.622615	0.0556533	0.62995	0.0565172	-0.00309704	0.0376046	4.91057	0.506093	0.913033	0.503915	21.2153	0.0196411	1.81835	0.935624	8.06691	0.921072
SviL8	7.66667	1.20185	0.670817	0.0815399	0.72662	0.0379199	0.735122	0.0382548	0.0788837	0.0866382	7.56433	1.11094	1.25167	1.24373	24.9469	0.24947	15.3929	0.423505	27.2329	0.983229
Za138	14	3.05505	0.797991	0.0472123	0.768201	0.0325363	0.777226	0.0332393	-0.0473017	0.103789	13.8407	2.95743	2.29603	1.26103	89.4232	0.98332	34.0761	0.19838	76.3325	1
Za199	5.33333	1.33333	0.493379	0.0876668	0.500066	0.0445634	0.505915	0.0450171	0.0283491	0.110298	5.1423	1.23432	1.2029	1.2029	2.37515	0.882171	6.00062	0.42312	25.3988	0.606055
