# Supplementary material for: Genetic consequences of pond production of a pikeperch (Sander lucioperca L.) stock with natural origin: the effects of changed selection pressure and reduced population size
Source: PeerJ. 2020 Mar 17;8:e8745. doi: 10.7717/peerj.8745 (PMC7083162; doi:10.7717/peerj.8745)
Supplement: Supplemental Information 4 [file peerj-08-8745-s004.xls]

## Sheet: FstS
Summary of Analysis of Molecular Variance by Locus
Input as Allelic Distance Matrix for F-Statistics Analysis
No. Samples	130
No. Pops	3
No. Regions	1
No. Permutations	9999
F-Statistics by Locus
	Msl-1	Msl-3	Msl-5	Msl-6	Msl-9	Msl-2	Pfla-L8	Svi-18	Svi-4	Svi-6	Svil-L7	PflaL3	SviL8	Za138	Za199	Tot
Fst	0.137953	0.0977535	0.0503703	0.0224888	0.158367	0.0689713	0.0323568	0.0191647	0.110543	0.0610888	0.00755908	0.0588507	0.124514	0.100396	0.0168092	0.0727746
Fis	-0.0310913	-0.0293835	-0.0108337	-0.0569334	0.0813664	-0.0785905	0.482893	-0.0287311	0.0186962	0.0127543	0.045938	0.00527953	0.0811599	-0.0325665	0.0326045	0.036392
Fit	0.111151	0.0712423	0.0400823	-0.0331643	0.226848	-0.00419869	0.499625	-0.00901578	0.127173	0.073064	0.0531498	0.0638195	0.195568	0.071099	0.0488656	0.106518
Fst max	0.329483	0.364116	0.12837	0.207621	0.311195	0.314614	0.175953	0.216147	0.30812	0.213866	0.361815	0.363459	0.256153	0.217755	0.481623	0.282473
F'st	0.418695	0.268468	0.392384	0.108317	0.5089	0.219225	0.183895	0.0886649	0.358766	0.28564	0.0208921	0.161918	0.486092	0.46105	0.0349012	0.257634
Probabilities, P(rand>=data), for F-Statistics by Locus based on Standard Permutation
	Msl-1	Msl-3	Msl-5	Msl-6	Msl-9	Msl-2	Pfla-L8	Svi-18	Svi-4	Svi-6	Svil-L7	PflaL3	SviL8	Za138	Za199	Tot
Fst	0.0001	0.0001	0.0001	0.0032	0.0001	0.0001	0.0001	0.0055	0.0001	0.0001	0.1219	0.0001	0.0001	0.0001	0.0373	0.0001
Fis	0.7658	0.7131	0.6394	0.9125	0.0421	0.9575	0.0001	0.7641	0.3307	0.3586	0.1858	0.4522	0.0246	0.8285	0.2877	0.0057
Fit	0.0032	0.0905	0.0874	0.7992	0.0001	0.5262	0.0001	0.5991	0.0033	0.0405	0.1473	0.1296	0.0001	0.0263	0.1913	0.0001
Probability, P(rand >= data), for Fst, Fis and Fit is based on standard permutation across the full data set.
