# Supplementary material for: Genetic consequences of pond production of a pikeperch (Sander lucioperca L.) stock with natural origin: the effects of changed selection pressure and reduced population size
Source: PeerJ. 2020 Mar 17;8:e8745. doi: 10.7717/peerj.8745 (PMC7083162; doi:10.7717/peerj.8745)
Supplement: Supplemental Information 5 [file peerj-08-8745-s005.xls]

## Sheet: AFP
Allele Frequencies and Sample Size by Populations
Locus	Allele/n	Broodstock	Offspring	Wild
Msl-1	N	40	44	46
	122	0	0	0.01087
	124	0	0	0.15217
	126	0	0	0.01087
	132	0.025	0	0.27174
	134	0	0	0.02174
	136	0	0	0.02174
	138	0.5375	0.69318	0.19565
	140	0.1	0.01136	0.15217
	142	0	0	0.05435
	144	0.0625	0.10227	0.02174
	146	0.125	0.03409	0.05435
	148	0.025	0.01136	0.01087
	150	0.125	0.14773	0.01087
	152	0	0	0.01087
Msl-3	N	40	44	46
	232	0.0125	0	0
	234	0	0	0.01087
	240	0.0875	0.07955	0.01087
	242	0	0	0.17391
	244	0.625	0.56818	0.31522
	246	0.1875	0.125	0.42391
	252	0.075	0.22727	0.02174
	254	0	0	0.01087
	256	0	0	0.01087
	260	0.0125	0	0.02174
Msl-5	N	40	44	46
	242	0.05	0.02273	0.05435
	244	0.025	0.18182	0
	246	0	0	0.01087
	248	0.0125	0	0
	250	0.0625	0.10227	0.02174
	254	0.05	0.17045	0.25
	256	0.0625	0.01136	0.04348
	258	0.075	0.02273	0.15217
	260	0	0	0.03261
	262	0	0	0.01087
	264	0.3	0.20455	0.02174
	268	0.025	0	0.03261
	270	0.0375	0	0.03261
	272	0.0875	0.11364	0.03261
	274	0	0	0.01087
	278	0.0125	0	0.01087
	280	0.1875	0.17045	0.08696
	282	0	0	0.01087
	284	0	0	0.1087
	286	0	0	0.02174
	288	0	0	0.03261
	290	0.0125	0	0.01087
	294	0	0	0.01087
Msl-6	N	40	44	46
	214	0	0	0.02174
	224	0.025	0.03409	0.01087
	228	0.325	0.15909	0.20652
	232	0.2125	0.20455	0.33696
	236	0.225	0.32955	0.16304
	238	0	0	0.01087
	240	0.0875	0.03409	0.1087
	242	0	0	0.03261
	244	0.125	0.23864	0.1087
Msl-9	N	40	44	46
	196	0	0	0.02174
	198	0	0	0.01087
	200	0.225	0.09091	0.68478
	202	0	0	0.01087
	204	0.125	0.06818	0.02174
	206	0.2	0.38636	0.13043
	210	0.2875	0.30682	0.09783
	212	0.125	0.04545	0.01087
	250	0.0375	0.10227	0.01087
Msl-2	N	40	44	46
	189	0.15	0.21591	0
	193	0	0	0.01087
	197	0.0125	0	0.01087
	199	0	0	0.02174
	201	0	0	0.02174
	203	0.5	0.5	0.40217
	205	0.0125	0.04545	0.01087
	207	0.3	0.22727	0.11957
	209	0	0	0.05435
	211	0.0125	0	0.31522
	213	0	0	0.03261
	215	0.0125	0.01136	0
Pfla-L8	N	40	44	46
	161	0.025	0	0.02174
	163	0.05	0	0.11957
	179	0.0625	0.03409	0.06522
	181	0.2625	0.11364	0.33696
	183	0.2	0.19318	0.23913
	185	0.1	0.19318	0.07609
	187	0.2375	0.25	0.06522
	191	0.0625	0.21591	0.04348
	193	0	0	0.01087
	195	0	0	0.02174
Svi-18	N	40	44	46
	146	0.175	0.29545	0.17391
	148	0.1125	0.03409	0.05435
	150	0.425	0.40909	0.29348
	152	0.0875	0.07955	0.02174
	154	0	0	0.01087
	156	0.0125	0	0.03261
	158	0	0	0.01087
	166	0	0	0.03261
	170	0.0625	0.07955	0.02174
	172	0.05	0.02273	0.01087
	174	0.075	0.07955	0.21739
	176	0	0	0.04348
	178	0	0	0.07609
Svi-4	N	40	44	46
	112	0.1	0.11364	0.01087
	116	0.1	0.09091	0.05435
	120	0.0125	0.01136	0.03261
	124	0	0	0.01087
	126	0.275	0.29545	0.6413
	128	0.35	0.43182	0.04348
	130	0	0	0.06522
	132	0.075	0.03409	0.11957
	152	0.0875	0.02273	0.01087
	154	0	0	0.01087
Svi-6	N	40	44	46
	107	0.325	0.27273	0.02174
	109	0	0	0.01087
	117	0	0	0.01087
	119	0	0	0.01087
	121	0	0	0.01087
	125	0	0	0.11957
	127	0.15	0.26136	0.07609
	129	0.25	0.21591	0.44565
	131	0.0875	0.06818	0.15217
	133	0.1125	0.07955	0.13043
	135	0.075	0.10227	0.01087
Svil-L7	N	40	44	46
	217	0.15	0.23864	0.11957
	219	0.05	0.11364	0.05435
	221	0.2125	0.09091	0.11957
	223	0.55	0.51136	0.61957
	225	0.025	0.03409	0.05435
	227	0.0125	0.01136	0.03261
PflaL3	N	40	44	46
	101	0	0	0.01087
	105	0.2625	0.27273	0.20652
	107	0.05	0.02273	0.06522
	109	0.4375	0.375	0.66304
	111	0	0	0.01087
	113	0.2375	0.32955	0.04348
	115	0.0125	0	0
SviL8	N	40	44	46
	103	0	0	0.01087
	107	0.0375	0.05682	0.11957
	117	0.1375	0.10227	0.05435
	119	0.2875	0.46591	0.20652
	121	0.075	0.02273	0.08696
	123	0.0375	0	0.02174
	127	0.025	0.02273	0.02174
	131	0.4	0.32955	0
	133	0	0	0.3587
	135	0	0	0.01087
	137	0	0	0.1087
Za138	N	40	44	46
	123	0	0	0.01087
	125	0	0	0.01087
	127	0	0	0.01087
	129	0.1	0.09091	0.3587
	131	0.125	0.07955	0.32609
	133	0.1	0.17045	0.02174
	135	0.0125	0	0.02174
	139	0.0125	0	0.01087
	141	0.3375	0.47727	0.05435
	143	0.0125	0	0
	145	0	0	0.01087
	147	0.1125	0.06818	0.04348
	149	0.075	0.05682	0.03261
	151	0.0125	0	0.01087
	153	0.025	0.03409	0.01087
	155	0.0125	0	0.01087
	157	0.0125	0	0.03261
	159	0.025	0.02273	0.01087
	161	0.0125	0	0.01087
	169	0.0125	0	0
Za199	N	40	44	46
	189	0	0	0.01087
	192	0	0	0.01087
	195	0.65	0.71591	0.63043
	198	0.075	0.01136	0.08696
	201	0	0	0.05435
	204	0	0	0.01087
	210	0.25	0.26136	0.09783
	213	0.025	0.01136	0.09783
